# Supplementary material for: Development of a QM/MM(ABEEM) method for the deprotonation of neutral and cation radicals in the G-tetrad and GGX(8-oxo-G) tetrad
Source: Royal Society of Chemistry journal article supplement (doi:10.1039/d3cp04357f), 2023-11-28
Supplement: d3cp04357f1.pdf [file d3cp04357f1.pdf]

## Supporting Information:

# Development of QM/MM(ABEEM) Method for the Deprotonation of Neutral and Cation Radicals in G-tetrad and GGX(8-oxo-G) Tetrad

Yue Wang,<sup>‡</sup> Linlin Liu,<sup>‡</sup> Yue Gao, Jiayue Zhao, Cui Liu,\* Lidong Gong,\* Zhongzhi Yang

School of Chemistry and Chemical Engineering, Liaoning Normal University, Dalian, 116029, People's Republic of China

Corresponding authors E-mail address:

liuc@lnnu.edu.cn (Cui Liu)

gongjw@lnnu.edu.cn (Lidong Gong)

Tel: +86 411-82158977

| <b>Index</b>                                                                                                                                                                                                                                                                                                                                                             | <b>page</b> |
|--------------------------------------------------------------------------------------------------------------------------------------------------------------------------------------------------------------------------------------------------------------------------------------------------------------------------------------------------------------------------|-------------|
| 1 The hydrogen bond fitting functions of H <sub>2</sub> O-H <sub>2</sub> O and H <sub>3</sub> O <sup>+</sup> -H <sub>2</sub> O, ABEEM PFF labels of 8-oxo-G <sup>+</sup> in GGX(8-oxo-G) tetrad, the linear correlations of charge distributions of G <sup>+</sup> in G-tetrad and X <sup>•</sup> in GGX(8-oxo-G) tetrad calculated by QM/MM(ABEEM) and QM methods ..... | S1          |
| 2 Position of proton in the optimized structures and variations of each site in the QM/MM(ABEEM) method .....                                                                                                                                                                                                                                                            | S7          |
| 3 The valence-state electronegativity piecewise function $\chi^*(r)$ , charge distributions of 8-oxo-G <sup>+</sup> , G1 <sup>•+</sup> , and G2 <sup>•</sup> in GGX(8-oxo-G) tetrad, linear correlations at key stationary point calculated by QM/MM(ABEEM) and QM methods .....                                                                                         | S9          |

**1 The hydrogen bond fitting functions of H<sub>2</sub>O-H<sub>2</sub>O and H<sub>3</sub>O<sup>+</sup>-H<sub>2</sub>O, ABEEM PFF labels of 8-oxo-G<sup>+</sup> in GGX(8-oxo-G) tetrad, the linear correlations of charge distributions of G<sup>+</sup> in G-tetrad and X' in GGX(8-oxo-G) tetrad calculated by QM/MM(ABEEM) and QM methods**

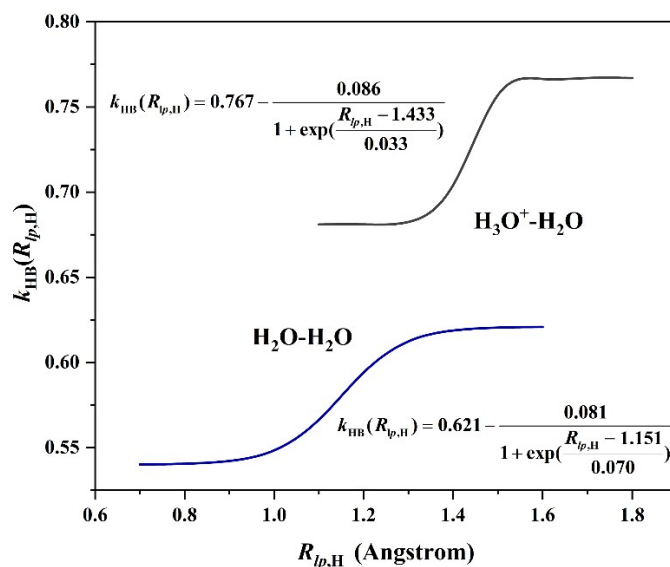

**Fig. S1** The different types of hydrogen bonds between water molecules (H<sub>2</sub>O-H<sub>2</sub>O and H<sub>3</sub>O<sup>+</sup>-H<sub>2</sub>O) are fitted by the distance ( $R_{lp,H}$ ) between the  $lp$  electrons of the O atom and H atom.

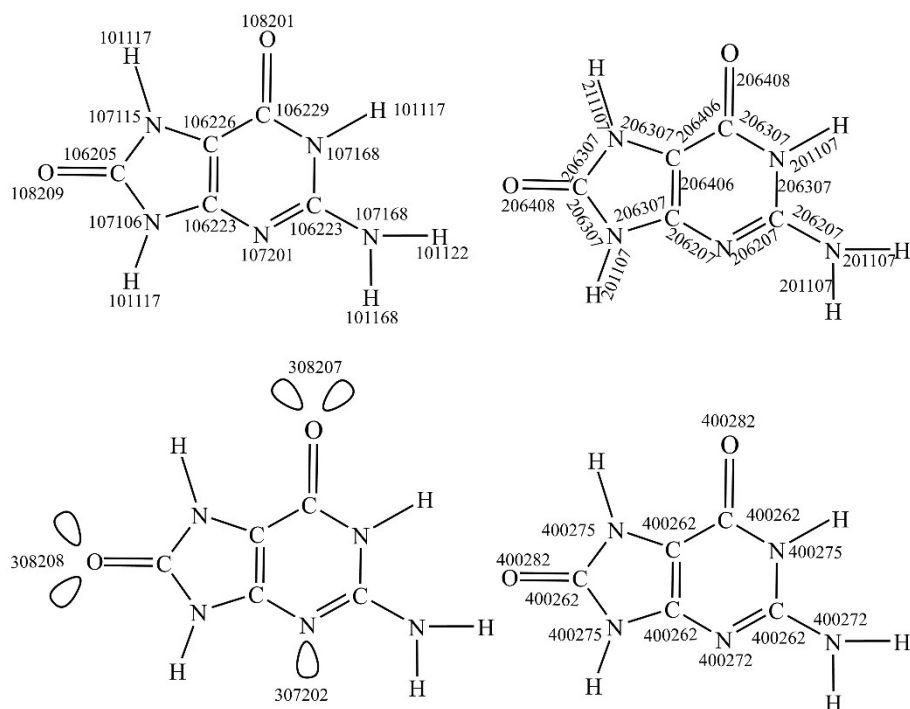

**Fig. S2** The ABEEM PFF label of each site of 8-oxo-G<sup>+</sup> in GGX(8-oxo-G) tetrad. The six digits beginning with 1 represent the atom site, the number beginning with 2 represents the  $\sigma$  bond site, the number beginning with 3 represents the *lp* electrons site, and the number beginning with 4 represents the  $\pi$  bond site.

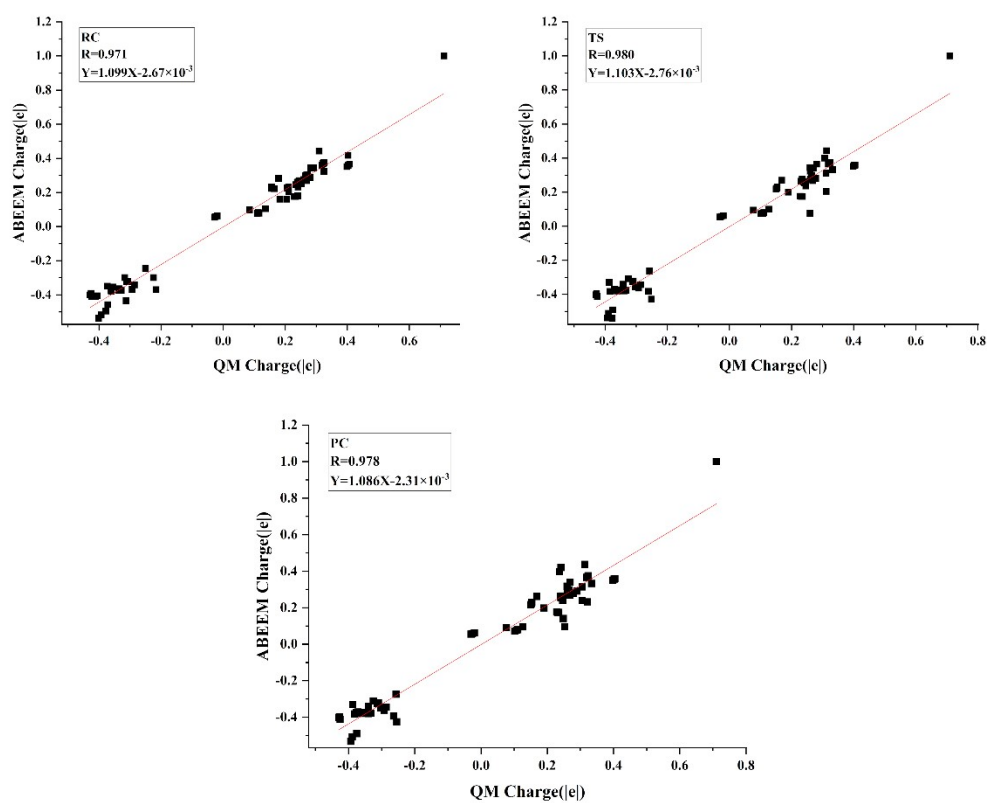

**Fig. S3** The linear correlations of charge distributions of RC, TS and PC during deprotonation of  $G^{++}$  in G-tetrad obtained by QM/MM(ABEEM) and QM methods.

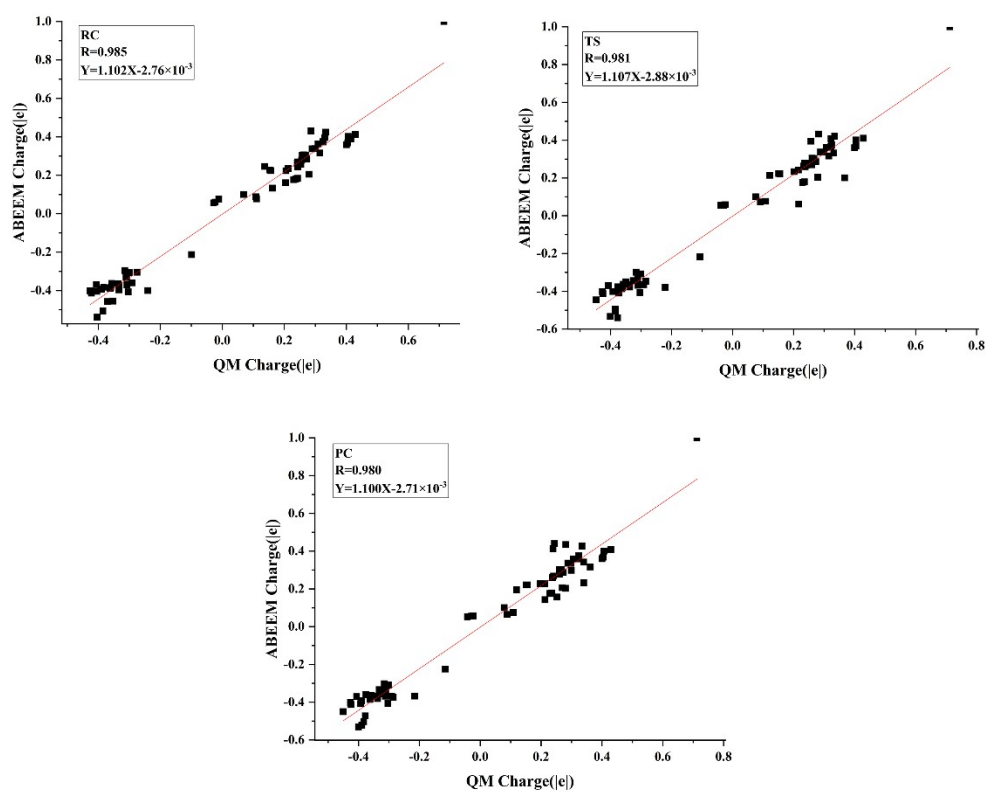

**Fig. S4** The linear correlations of charge distributions of RC, TS and PC during deprotonation of X<sup>\*</sup> in GGX(8-oxo-G) tetrad obtained by QM/MM(ABEEM) and QM methods.

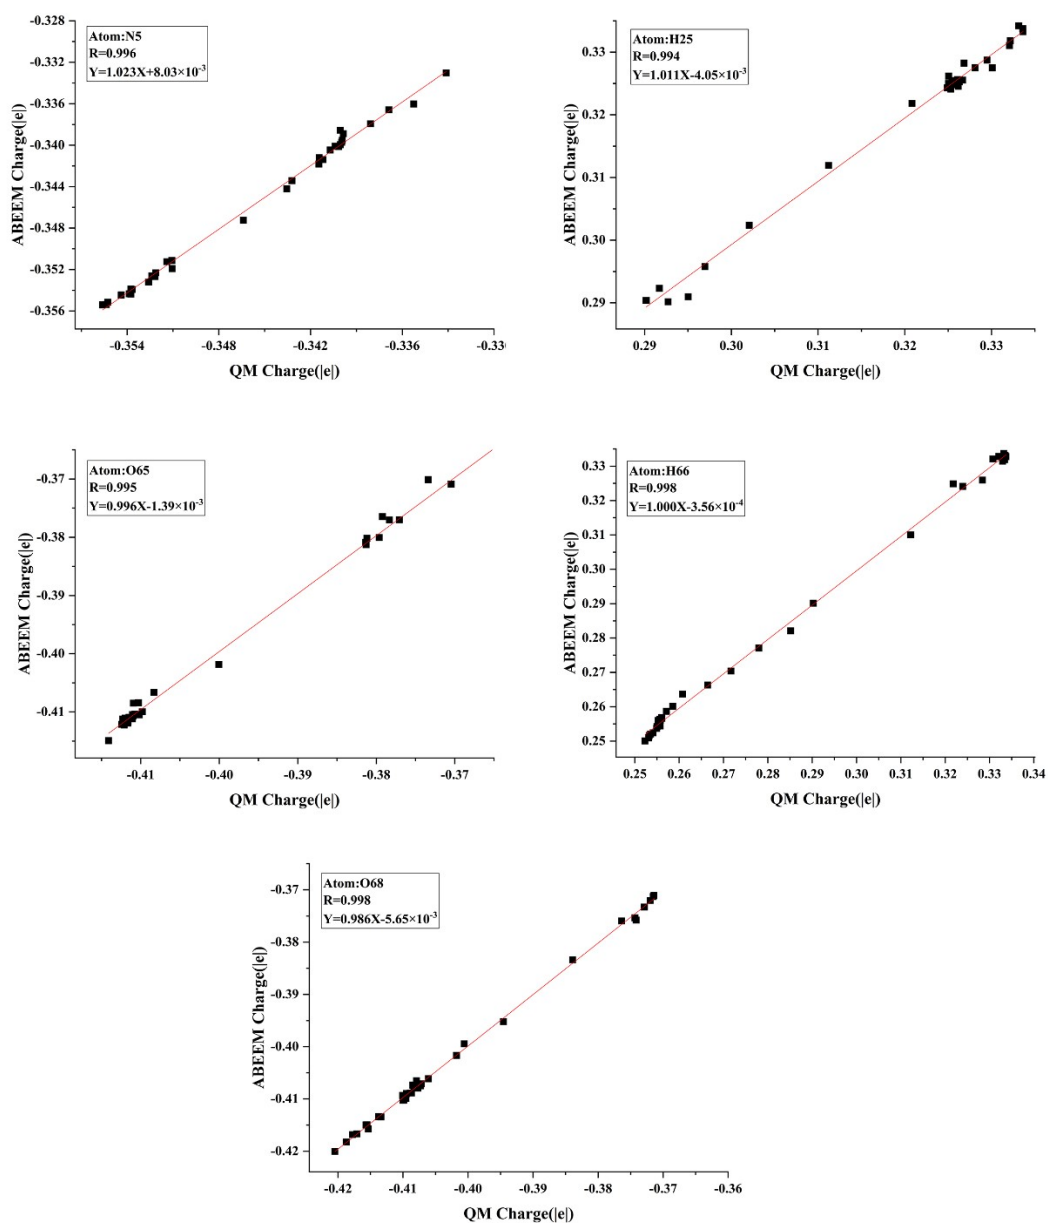

**Fig. S5** The linear correlations of the atoms involved in bond-forming and bond-breaking calculated by QM/MM(ABEEM) and QM methods in the deprotonation process of  $G^{*+}$  in G-tetrad.

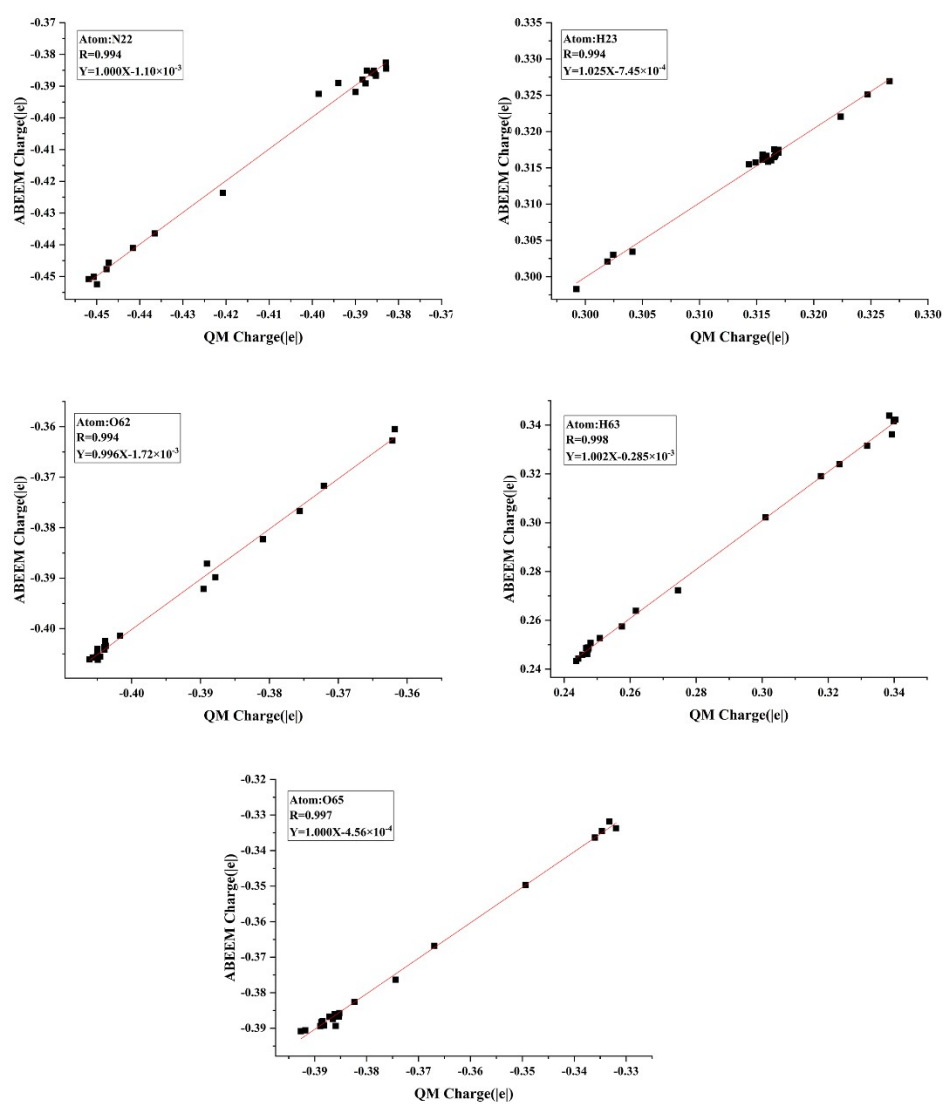

**Fig. S6** The linear correlations of the atoms involved in bond-forming and bond-breaking obtained by QM/MM(ABEEM) and QM methods in the deprotonation process of X\* in GGX(8-oxo-G) tetrad.

## 2 Position of proton in the optimized structures and variations of each site in the QM/MM(ABEEM) method

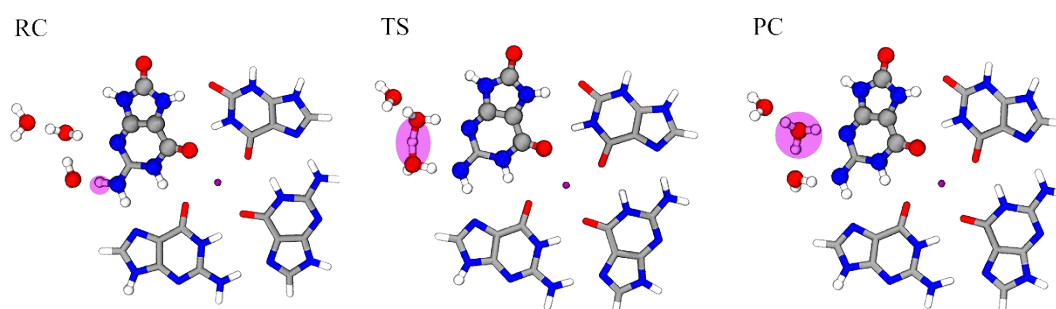

**Fig. S7** The position of proton in the optimized structures of RC, TS, and PC in the deprotonation of 8-oxo-G<sup>+</sup> in GGX(8-oxo-G) tetrad. Sodium ion (purple sphere), nitrogen atom (blue sphere), oxygen atom (red sphere), carbon atom (grey sphere) and hydrogen atom (white sphere).

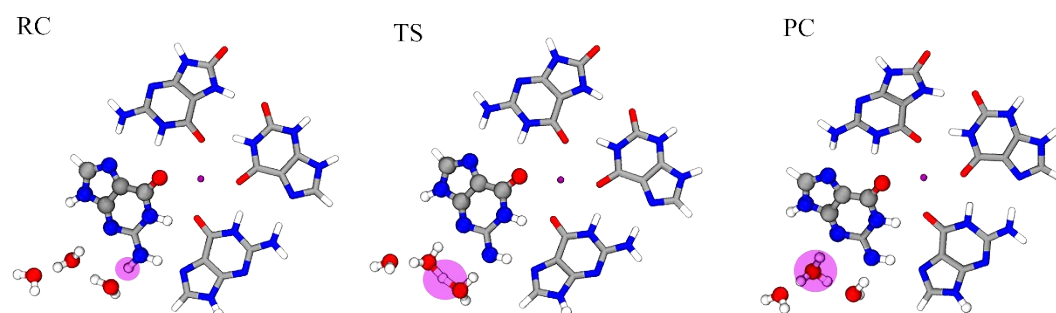

**Fig. S8** The position of proton in the optimized structures of RC, TS, and PC in the deprotonation of G1<sup>+</sup> in GGX(8-oxo-G) tetrad. Sodium ion (purple sphere), nitrogen atom (blue sphere), oxygen atom (red sphere), carbon atom (grey sphere) and hydrogen atom (white sphere).



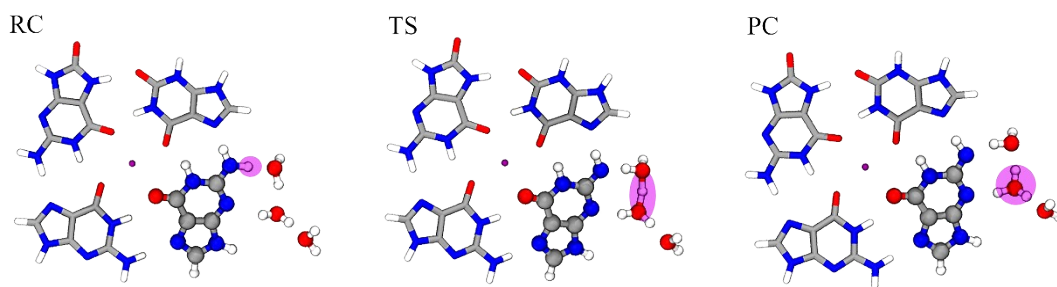

**Fig. S9** The position of proton in optimized structures of RC, TS, and PC in the deprotonation of G2\* in GGX(8-oxo-G) tetrad. Sodium ion (purple sphere), nitrogen atom (blue sphere), oxygen atom (red sphere), carbon atom (grey sphere) and hydrogen atom (white sphere).

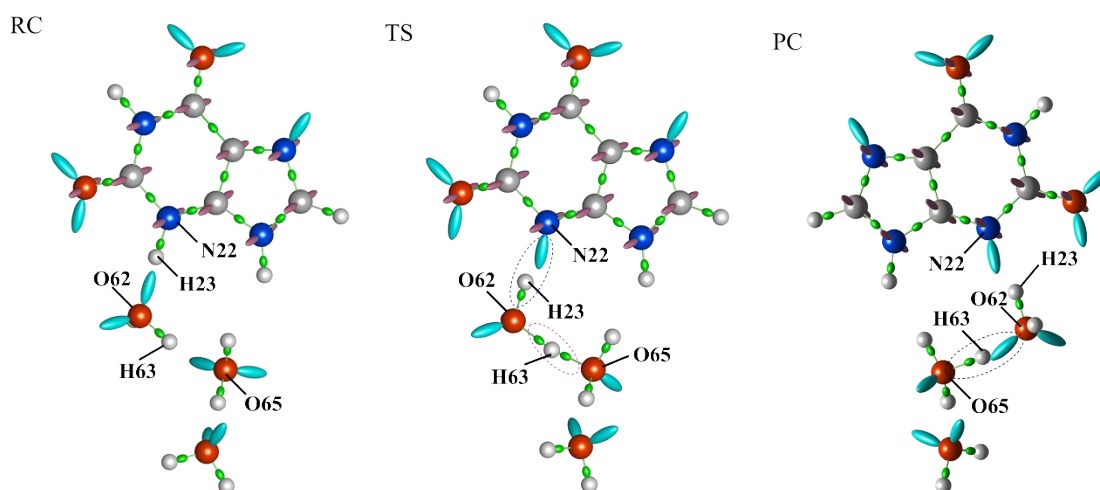

**Fig. S10** Variations of each ABEEM site of RC, TS, and PC in the deprotonation of X\* in GGX(8-oxo-G) tetrad.

**3 The valence-state electronegativity piecewise function  $\chi^*(r)$ , charge distributions of 8-oxo-G<sup>+</sup>, G1<sup>+</sup>, and G2<sup>•</sup> in GGX(8-oxo-G) tetrad, linear correlations at key stationary point calculated by QM/MM(ABEEM) and QM methods**

**Table S1** The  $\chi^*(r)$  of N5 in the deprotonation of G<sup>+</sup> in G-tetrad ( $r$  represents the distance between N5 and H25)

| Distances(Å)         | Functions                                                | Distances(Å)         | Functions                                              |
|----------------------|----------------------------------------------------------|----------------------|--------------------------------------------------------|
| $1.67 < r \leq 1.72$ | $3.525 - \frac{0.901}{1.0 + \exp \frac{r-1.687}{0.069}}$ | $1.59 < r \leq 1.67$ | $3.674 - \frac{0.036}{1.0 + \exp \frac{r-1.112}{0.2}}$ |
| $1.15 < r \leq 1.59$ | $4.032 - \frac{0.344}{1.0 + \exp \frac{r-1.373}{0.117}}$ | $1.09 < r \leq 1.15$ | $4.898r + 5.468$                                       |
| $1.06 < r \leq 0.9$  | $3.546 - \frac{0.251}{1.0 + \exp \frac{r-1.11}{0.01}}$   |                      |                                                        |

**Table S2** The  $\chi^*(r)$  of H25 in the deprotonation of G<sup>+</sup> in G-tetrad ( $r$  represents the distance between H25 and O65)

| Distances(Å)         | Functions                                                | Distances(Å)         | Functions                                                |
|----------------------|----------------------------------------------------------|----------------------|----------------------------------------------------------|
| $1.0 < r \leq 1.02$  | $3.126 - \frac{0.731}{1.0 + \exp \frac{r-1.014}{0.012}}$ | $1.02 < r \leq 1.05$ | $7.273r + 5.358$                                         |
| $1.05 < r \leq 1.37$ | $21.523r^2 - 57.144r + 39.25$                            | $1.37 < r \leq 1.54$ | $1.755 - \frac{1.501}{1.0 + \exp \frac{r-1.490}{0.301}}$ |
| $1.54 < r \leq 1.60$ | $2.44 - \frac{0.79}{1.0 + \exp \frac{r-1.58}{0.301}}$    |                      |                                                          |

**Table S3** The  $\chi^*(r)$  of O65 in the deprotonation of G<sup>+</sup> in G-tetrad ( $r$  represents the distance between O65 and H25)

| Distances(Å)         | Functions                                              | Distances(Å)         | Functions                                              |
|----------------------|--------------------------------------------------------|----------------------|--------------------------------------------------------|
| $1.0 < r \leq 1.02$  | $4.2 - \frac{2.001}{1.0 + \exp \frac{r-1.005}{0.008}}$ | $1.02 < r \leq 1.05$ | $2.545r + 5.917$                                       |
| $1.05 < r \leq 1.37$ | $9.178r^2 - 16.45r + 39.25$                            | $1.37 < r \leq 1.54$ | $4.620 - \frac{2.711}{1.0 + \exp \frac{r-1.5}{0.355}}$ |
| $1.54 < r \leq 1.60$ | $3.58 - \frac{0.401}{1.0 + \exp \frac{r-1.58}{0.075}}$ |                      |                                                        |

**Table S4** The  $\chi^*(r)$  of H66 in the deprotonation of G<sup>+</sup> in G-tetrad ( $r$  represents the distance between H66 and O68)

| Distances(Å)         | Functions                                                | Distances(Å)         | Functions                                               |
|----------------------|----------------------------------------------------------|----------------------|---------------------------------------------------------|
| $1.11 < r \leq 1.14$ | $2.09 - \frac{0.001}{1.0 + \exp \frac{r-1.59}{0.118}}$   | $1.14 < r \leq 1.20$ | $0.406r + 1.981$                                        |
| $1.20 < r \leq 1.49$ | $3.098 - \frac{0.820}{1.0 + \exp \frac{r-1.455}{0.022}}$ | $1.49 < r \leq 1.54$ | $2.425 - \frac{0.455}{1.0 + \exp \frac{r-1.59}{0.118}}$ |

**Table S5** The  $\chi^*(r)$  of O68 in the deprotonation of G<sup>+</sup> in G-tetrad ( $r$  represents the distance between O68 and H66)

| Distances(Å)         | Functions                                              | Distances(Å)         | Functions                                           |
|----------------------|--------------------------------------------------------|----------------------|-----------------------------------------------------|
| $1.11 < r \leq 1.14$ | $2.09 - \frac{0.001}{1.0 + \exp \frac{r-1.59}{0.118}}$ | $1.14 < r \leq 1.20$ | $1.375r + 1.416$                                    |
| $1.20 < r \leq 1.49$ | $-0.707r^2 + 3.512r - 0.051$                           | $1.49 < r \leq 1.63$ | $4.268 - \frac{1.5}{1.0 + \exp \frac{r-1.55}{0.9}}$ |
| $1.63 < r \leq 1.7$  | $3.2 - \frac{0.19}{1.0 + \exp \frac{r-1.667}{1.105}}$  |                      |                                                     |

**Table S6** The  $\chi^*(r)$  of N22 in the deprotonation of X\* in GGX(8-oxo-G) tetrad ( $r$  represents the distance between N22 and H23)

| Distances(Å)           | Functions                                                | Distances(Å)          | Functions                                                |
|------------------------|----------------------------------------------------------|-----------------------|----------------------------------------------------------|
| $1.06 < r \leq 1.0725$ | $3.193 - \frac{0.081}{1.0 + \exp \frac{r-1.070}{0.002}}$ | $1.484 < r \leq 1.60$ | 2.654                                                    |
| $1.0725 < r \leq 1.08$ | $3.740 + \frac{0.289}{1.0 + \exp \frac{r-1.075}{0.080}}$ | $1.60 < r \leq 1.72$  | $3.480 - \frac{1.591}{1.0 + \exp \frac{r-1.656}{0.005}}$ |
| $1.08 < r \leq 1.484$  | $-1.232r^2 + 4.369r + 0.628$                             |                       |                                                          |

**Table S7** The  $\chi^*(r)$  of O65 in the deprotonation of X\* in GGX(8-oxo-G) tetrad ( $r$  represents the distance between H63 and O65)

| Distances(Å)         | Functions                                                | Distances(Å)         | Functions         |
|----------------------|----------------------------------------------------------|----------------------|-------------------|
| $1.58 < r \leq 1.71$ | $3.207 + \frac{0.095}{1.0 + \exp \frac{r-1.560}{1.100}}$ | $1.12 < r \leq 1.15$ | $-0.764r + 3.378$ |
| $1.51 < r \leq 1.58$ | $0.352r + 2.983$                                         | $1.11 < r \leq 1.12$ | $9.062r - 7.552$  |
| $1.15 < r \leq 1.51$ | $3.570 - \frac{3.889}{1.0 + \exp \frac{r-1.012}{0.127}}$ |                      |                   |

**Table S8** The  $\chi^*(r)$  of H23 in the deprotonation of X\* in GGX(8-oxo-G) tetrad ( $r$  represents the distance between H23 and O62)

| Distances(Å)         | Functions                                                | Distances(Å)          | Functions          |
|----------------------|----------------------------------------------------------|-----------------------|--------------------|
| $1.57 < r \leq 1.60$ | $2.312 + \frac{0.790}{1.0 + \exp \frac{r-1.573}{0.200}}$ | $1.02 < r \leq 1.11$  | $-9.536r + 12.697$ |
| $1.36 < r \leq 1.57$ | $2.432 + \frac{0.012}{1.0 + \exp \frac{r-1.560}{0.226}}$ | $1.009 < r \leq 1.02$ | $3.730r - 1.216$   |
| $1.45 < r \leq 1.56$ | $10.020r^2 - 31.025r + 26.368$                           | $1.00 < r \leq 1.009$ | $23.121r - 20.758$ |
| $1.11 < r \leq 1.45$ | $19.472r^2 - 50.990r + 35.470$                           |                       |                    |

**Table S9** The  $\chi^*(r)$  of H63 in the deprotonation of X\* in GGX(8-oxo-G) tetrad ( $r$  represents the distance between H63 and O65)

| Distances(Å)         | Functions                                                | Distances(Å)         | Functions                      |
|----------------------|----------------------------------------------------------|----------------------|--------------------------------|
| $1.52 < r \leq 1.72$ | $2.400 + \frac{0.415}{1.0 + \exp \frac{r-1.590}{0.118}}$ | $1.3 < r \leq 1.35$  | $20.269r^2 - 51.565r + 35.030$ |
| $1.35 < r \leq 1.49$ | $2.970r - 1.734$                                         | $1.11 < r \leq 1.30$ | $0.647r + 1.937$               |

**Table S10** The  $\chi^*(r)$  of O62 in the deprotonation of X\* in GGX(8-oxo-G) tetrad ( $r$  represents the distance between H23 and O62)

| Distances(Å)         | Functions                                                | Distances(Å)          | Functions                                                |
|----------------------|----------------------------------------------------------|-----------------------|----------------------------------------------------------|
| $1.55 < r \leq 1.60$ | $3.525 - \frac{0.251}{1.0 + \exp \frac{r-1.580}{0.075}}$ | $1.015 < r \leq 1.11$ | $3.181 + \frac{1.105}{1.0 + \exp \frac{r-1.032}{0.005}}$ |
| $1.37 < r \leq 1.55$ | $4.400 - \frac{2.211}{1.0 + \exp \frac{r-1.500}{0.355}}$ | $1.0 < r \leq 1.015$  | $3.840 + \frac{0.276}{1.0 + \exp \frac{r-1.025}{0.300}}$ |
| $1.11 < r \leq 1.37$ | $5.949r - 3.199$                                         |                       |                                                          |

**Table S11** Charge ( $|e|$ ) distributions of 8-oxo-G<sup>+</sup> in GGX(8-oxo-G) tetrad

| Structure            | RC   | TS   | PC   |
|----------------------|------|------|------|
| G1                   | 0.14 | 0.10 | 0.09 |
| G2                   | 0.11 | 0.11 | 0.11 |
| X                    | 0.13 | 0.13 | 0.13 |
| 8-oxo-G <sup>+</sup> | 0.80 | ---  | ---  |
| 8-oxo-G (-H)         | ---  | 0.14 | 0.12 |
| W1                   | 0.04 | ---  | 0.15 |
| W1...H...W2          | ---  | 0.73 | ---  |
| W2                   | 0.01 | ---  | ---  |
| W2...H               | ---  | ---  | 0.59 |
| W3                   | 0.05 | 0.09 | 0.10 |
| Na <sup>+</sup>      | 0.71 | 0.71 | 0.71 |

**Table S12** Charge ( $|e|$ ) distributions of G1<sup>+</sup> in GGX(8-oxo-G) tetrad

| Structure       | RC   | TS   | PC   |
|-----------------|------|------|------|
| 8-oxo-G         | 0.06 | 0.05 | 0.05 |
| G2              | 0.16 | 0.10 | 0.10 |
| X               | 0.16 | 0.15 | 0.15 |
| G1 <sup>+</sup> | 0.63 | ---  | ---  |
| G1(-H)          | ---  | 0.16 | 0.14 |
| W1              | 0.05 | ---  | 0.16 |
| W1...H...W2     | ---  | 0.74 | ---  |
| W2              | 0.01 | ---  | ---  |
| W2...H          | ---  | ---  | 0.59 |
| W3              | 0.05 | 0.09 | 0.10 |
| Na <sup>+</sup> | 0.71 | 0.71 | 0.71 |

**Table S13** Charge ( $|e|$ ) distributions of G2 $\cdot$  in GGX(8-oxo-G) tetrad

| Structure                 | RC    | TS   | PC   |
|---------------------------|-------|------|------|
| G1                        | 0.10  | 0.11 | 0.11 |
| 8-oxo-G                   | 0.99  | 0.04 | 0.04 |
| X                         | 0.19  | 0.15 | 0.15 |
| G2 $\cdot$                | -0.09 | ---  | ---  |
| G2(-H) $\cdot$            | ---   | 0.16 | 0.14 |
| W1                        | 0.03  | ---  | 0.16 |
| W1 $\cdots$ H $\cdots$ W2 | ---   | 0.74 | ---  |
| W2                        | 0.01  | ---  | ---  |
| W2 $\cdots$ H             | ---   | ---  | 0.59 |
| W3                        | 0.04  | 0.09 | 0.10 |
| Na $^+$                   | 0.72  | 0.71 | 0.71 |

**Table S14** The linear correlations at each stationary point calculated by QM/MM(ABEEM) and QM methods in the deprotonation of G<sup>+</sup> in G-tetrad

| Local conservation<br>condition 1 |      | Local conservation<br>condition 2 |      | Local conservation<br>condition 3 |      |
|-----------------------------------|------|-----------------------------------|------|-----------------------------------|------|
| Reaction path                     | R    | Reaction path                     | R    | Reaction path                     | R    |
| 1                                 | 0.98 | 46                                | 0.97 | 53                                | 0.97 |
| 4                                 | 0.98 | 50                                | 0.97 | 57                                | 0.97 |
| 7                                 | 0.98 | -                                 | -    | 59                                | 0.97 |
| 10                                | 0.98 | -                                 | -    | 63                                | 0.97 |
| 13                                | 0.98 | -                                 | -    | -                                 | -    |
| 16                                | 0.98 | -                                 | -    | -                                 | -    |
| 19                                | 0.98 | -                                 | -    | -                                 | -    |
| 22                                | 0.98 | -                                 | -    | -                                 | -    |
| 25                                | 0.98 | -                                 | -    | -                                 | -    |
| 28                                | 0.98 | -                                 | -    | -                                 | -    |
| 31                                | 0.98 | -                                 | -    | -                                 | -    |
| 37                                | 0.98 | -                                 | -    | -                                 | -    |
| 40                                | 0.98 | -                                 | -    | -                                 | -    |
| 43                                | 0.98 | -                                 | -    | -                                 | -    |



**Table S15** The linear correlations of at each stationary point calculated by QM/MM(ABEEM) and QM methods in the deprotonation of X\* in GGX(8-oxo-G) tetrad

| Local conservation<br>condition 1 |      | Local conservation<br>condition 2 |      | Local conservation<br>condition 3 |      |
|-----------------------------------|------|-----------------------------------|------|-----------------------------------|------|
| Reaction path                     | R    | Reaction path                     | R    | Reaction path                     | R    |
| 1                                 | 0.98 | 46                                | 0.97 | 53                                | 0.98 |
| 4                                 | 0.98 | 50                                | 0.97 | 57                                | 0.98 |
| 7                                 | 0.98 | -                                 | -    | 59                                | 0.98 |
| 10                                | 0.98 | -                                 | -    | 63                                | 0.98 |
| 13                                | 0.98 | -                                 | -    |                                   |      |
| 16                                | 0.98 | -                                 | -    |                                   |      |
| 19                                | 0.98 | -                                 | -    | -                                 | -    |
| 22                                | 0.98 | -                                 | -    | -                                 | -    |
| 25                                | 0.98 | -                                 | -    | -                                 | -    |
| 28                                | 0.98 | -                                 | -    | -                                 | -    |
| 31                                | 0.98 | -                                 | -    | -                                 | -    |
| 37                                | 0.98 | -                                 | -    | -                                 | -    |
| 40                                | 0.98 | -                                 | -    | -                                 | -    |
| 43                                | 0.98 | -                                 | -    | -                                 | -    |
